# Supplementary material for: Development, biological evaluation, and molecular modelling of novel isocytosine and guanidine derivatives as BACE1 inhibitors using a fragment growing strategy
Source: Royal Society of Chemistry journal article supplement (doi:10.1039/d4md00698d), 2025-01-01
Supplement: d4md00698d2.xlsx [file d4md00698d2.xlsx]

## Sheet: Sheet1
Compounds	SMILES	BACE1 IC50 (μM)	% Scoring β-Amyloid Aggregation drop to PbAc	% MDA level drop to PbAc	% NO level drop to PbAc	% GSH level raise to PbAc	% CAT level raise to PbAc	% SOD level raise to PbAc	Grade of brain tissue lesions
2	O=C(OCC)CC(C1=CC=CC(Br)=C1)=O
2'	O=C(OCC)CC(CC1=CC=CC(Br)=C1)=O
3	O=C1NC(N)=NC(C2=CC=CC(Br)=C2)=C1
3'	O=C1NC(N)=NC(CC2=CC=CC(Br)=C2)=C1
4a	O=C1NC(N)=NC(C2=CC(C3=CC=CC=C3)=CC=C2)=C1	69.02±0.09
4b	O=C1NC(N)=NC(C2=CC(C3=CC=C(OC(F)(F)F)C=C3)=CC=C2)=C1	6.93±0.01
4c	O=C1NC(N)=NC(C2=CC(C3=CC=C(C(C)=O)C=C3)=CC=C2)=C1	17.95±0.02
4d	O=C1NC(N)=NC(C2=CC(C3=CC=C(OCC)C=C3)=CC=C2)=C1	8.82±0.01
4e	O=C1NC(N)=NC(C2=CC(C3=CC=C(CCCC)C=C3)=CC=C2)=C1	26.40±0.03
4f	O=C1NC(N)=NC(C2=CC(C3=CC=C(C(C)C)C=C3)=CC=C2)=C1	53.82±0.12
4g	O=C1NC(N)=NC(C2=CC(C3=CC=C(OC)C(OC)=C3)=CC=C2)=C1	12.89±0.10
4'a	O=C1NC(N)=NC(CC2=CC(C3=CC=CC=C3)=CC=C2)=C1	11.40±0.11
4'b	O=C1NC(N)=NC(CC2=CC(C3=CC=C(F)C=C3)=CC=C2)=C1	10.03±0.20
4'c	O=C1NC(N)=NC(CC2=CC(C3=CC=C(OC(F)(F)F)C=C3)=CC=C2)=C1	4.54±0.01
4'd	O=C1NC(N)=NC(CC2=CC(C3=CC=C(C(C)=O)C=C3)=CC=C2)=C1	9.85±0.03
4'e	O=C1NC(N)=NC(CC2=CC(C3=CC=C(OCC)C=C3)=CC=C2)=C1	ND
4'f	O=C1NC(N)=NC(CC2=CC(C3=CC=C(OC)C=C3)=CC=C2)=C1	10.21±0.07
4'g	O=C1NC(N)=NC(CC2=CC(C3=CC=C(CCCC)C=C3)=CC=C2)=C1	4.49±0.17
4'h	O=C1NC(N)=NC(CC2=CC(C3=CC=C(C(C)C)C=C3)=CC=C2)=C1	17.55±0.21
6	O=CC1=CNC2=C1C=C(Br)C=C2
7a	O=CC1=CNC2=C1C=C(C3=CC=C(F)C=C3)C=C2
7b	O=CC1=CNC2=C1C=C(C3=CC=C(OC(F)(F)F)C=C3)C=C2
7c	O=CC1=CNC2=C1C=C(C3=CC=C(OC)C=C3)C=C2
7d	O=CC1=CNC2=C1C=C(C3=CC=C(OCC)C=C3)C=C2
7e	O=CC1=CNC2=C1C=C(C3=CC=C(CCCC)C=C3)C=C2
7f	O=CC1=CNC2=C1C=C(C3=CC=C(C(C)C)C=C3)C=C2
8a	O=C(C1=CNC2=C1C=C(C3=CC=C(F)C=C3)C=C2)O
8b	O=C(C1=CNC2=C1C=C(C3=CC=C(C(F)(F)F)C=C3)C=C2)O
8c	O=C(C1=CNC2=C1C=C(C3=CC=C(OC)C=C3)C=C2)O
8d	O=C(C1=CNC2=C1C=C(C3=CC=C(OCC)C=C3)C=C2)O
8e	O=C(C1=CNC2=C1C=C(C3=CC=C(CCCC)C=C3)C=C2)O
8f	O=C(C1=CNC2=C1C=C(C3=CC=C(C(C)C)C=C3)C=C2)O
9a	O=C(C1=CNC2=C1C=C(C3=CC=C(F)C=C3)C=C2)/N=C(N)\N	11.74±0.08
9b	O=C(C1=CNC2=C1C=C(C3=CC=C(OC(F)(F)F)C=C3)C=C2)/N=C(N)\N	11.49±0.07
9c	O=C(C1=CNC2=C1C=C(C3=CC=C(OC)C=C3)C=C2)/N=C(N)\N	2.79±0.04
9d	O=C(C1=CNC2=C1C=C(C3=CC=C(OCC)C=C3)C=C2)/N=C(N)\N	10.56±0.10
9e	O=C(C1=CNC2=C1C=C(C3=CC=C(CCCC)C=C3)C=C2)/N=C(N)\N	5.47±0.11
9f	O=C(C1=CNC2=C1C=C(C3=CC=C(C(C)C)C=C3)C=C2)/N=C(N)\N	28.27±0.03
10	O=C(C1=CNC2=C1C=C(Br)C=C2)O
11	O=C(C1=CNC2=C1C=C(Br)C=C2)/N=C(N)\N	> 100
13a	O=CC1=CC=C(OCC=C)C=C1
13b	O=CC1=CC=C(OC(C)C)C=C1
13c	O=CC1=CC=C(OCC(C)C)C=C1
13d	O=CC1=CC=C(OC2CCCC2)C=C1
13e	O=CC1=CC=C(OCC2=CC=CC=C2)C=C1
13f	O=CC1=CC=C(OCC2=CC=CC(OC)=C2)C=C1
13g	O=CC1=CC=C(OCC2=CC=CC(F)=C2)C=C1
13h	O=CC1=CC=C(OCC2=CC=CC(C(F)(F)F)=C2)C=C1
13i	O=CC1=CC=C(OCC2=CC=C([N+]([O-])=O)C=C2)C=C1
14a	C=CCOC1=CC=C(C2=NC3=CC=CC=C3N2)C=C1
14b	CC(OC1=CC=C(C2=NC3=CC=CC=C3N2)C=C1)C
14c	CC(C)COC1=CC=C(C2=NC3=CC=CC=C3N2)C=C1
14d	C1(C2=CC=C(OC3CCCC3)C=C2)=NC4=CC=CC=C4N1
14e	C1(C2=CC=C(OCC3=CC=CC=C3)C=C2)=NC4=CC=CC=C4N1
14f	COC1=CC(COC2=CC=C(C3=NC4=CC=CC=C4N3)C=C2)=CC=C1
14g	FC1=CC(COC2=CC=C(C3=NC4=CC=CC=C4N3)C=C2)=CC=C1
14h	FC(C1=CC(COC2=CC=C(C3=NC4=CC=CC=C4N3)C=C2)=CC=C1)(F)F
14i	O=[N+](C1=CC=C(C=C1)COC2=CC=C(C3=NC4=CC=CC=C4N3)C=C2)[O-]
14j	C1(C2=CC=CC=C2)=NC3=CC=CC=C3N1
14k	COC1=CC=C(C2=NC3=CC=CC=C3N2)C=C1OC
15a	O=C(OCC)CN1C(C2=CC=C(OCC=C)C=C2)=NC3=CC=CC=C13
15b	O=C(OCC)CN1C(C2=CC=C(OC(C)C)C=C2)=NC3=CC=CC=C13
15c	O=C(OCC)CN1C(C2=CC=C(OCC(C)C)C=C2)=NC3=CC=CC=C13
15d	O=C(OCC)CN1C(C2=CC=C(OC3CCCC3)C=C2)=NC4=CC=CC=C14
15e	O=C(OCC)CN1C(C2=CC=C(OCC3=CC=CC=C3)C=C2)=NC4=CC=CC=C14
15f	O=C(OCC)CN1C(C2=CC=C(OCC3=CC=CC(OC)=C3)C=C2)=NC4=CC=CC=C14
15g	O=C(OCC)CN1C(C2=CC=C(OCC3=CC=CC(F)=C3)C=C2)=NC4=CC=CC=C14
15h	O=C(OCC)CN1C(C2=CC=C(OCC3=CC=CC(C(F)(F)F)=C3)C=C2)=NC4=CC=CC=C14
15i	O=C(OCC)CN1C(C2=CC=C(OCC3=CC=C([N+]([O-])=O)C=C3)C=C2)=NC4=CC=CC=C14
15j	O=C(OCC)CN1C(C2=CC=CC=C2)=NC3=CC=CC=C13
15k	O=C(OCC)CN1C(C2=CC=C(OC)C(OC)=C2)=NC3=CC=CC=C13
16a	O=C(/N=C(N)/N)CN1C(C2=CC=C(OCC=C)C=C2)=NC3=CC=CC=C13	3.86±0.11	56.25	44.41	61.75	87.38	64.77	182.61	Grade 2 = 35%
16b	O=C(/N=C(N)/N)CN1C(C2=CC=C(OC(C)C)C=C2)=NC3=CC=CC=C13	0.67±0.04
16c	O=C(/N=C(N)/N)CN1C(C2=CC=C(OCC(C)C)C=C2)=NC3=CC=CC=C13	2.53±0.06
16d	O=C(/N=C(N)/N)CN1C(C2=CC=C(OC3CCCC3)C=C2)=NC4=CC=CC=C14	5.71±0.20
16e	O=C(/N=C(N)/N)CN1C(C2=CC=C(OCC3=CC=CC=C3)C=C2)=NC4=CC=CC=C14	8.81±0.04
16f	O=C(/N=C(N)/N)CN1C(C2=CC=C(OCC3=CC=CC(OC)=C3)C=C2)=NC4=CC=CC=C14	11.93±0.05
16g	O=C(/N=C(N)/N)CN1C(C2=CC=C(OCC3=CC=CC(F)=C3)C=C2)=NC4=CC=CC=C14	0.76±0.08
16h	O=C(/N=C(N)/N)CN1C(C2=CC=C(OCC3=CC=CC(C(F)(F)F)=C3)C=C2)=NC4=CC=CC=C14	8.61±0.11
16i	O=C(/N=C(N)/N)CN1C(C2=CC=C(OCC3=CC=C([N+]([O-])=O)C=C3)C=C2)=NC4=CC=CC=C14	32.63±0.10
16j	O=C(/N=C(N)/N)CN1C(C2=CC=CC=C2)=NC3=CC=CC=C13	ND
16k	O=C(/N=C(N)/N)CN1C(C2=CC=C(OC)C(OC)=C2)=NC3=CC=CC=C13	13.50±0.09	93.75	46.11	62.81	110.96	31.09	138.16	Grade 1 = 5%
